# Supplementary material for: Thermostable enzyme-immobilized magnetic responsive Ni-based metal–organic framework nanorods as recyclable biocatalysts for efficient biosynthesis ofS-adenosylmethionine
Source: Royal Society of Chemistry journal article supplement (doi:10.1039/c8dt04857f), 2019-01-01
Supplement: c8dt04857f1.pdf [file c8dt04857f1.pdf]

## **Electronic supplementary information**

# **Thermostable enzyme-immobilized magnetic responsive Ni-based metal-organic framework nanorods as recyclable biocatalyst for efficient biosynthesis of S-adenosylmethionine**

*Jie He, Shanshan Sun, Zhao Zhou, Qipeng Yuan, Yanhui Liu\*, and Hao Liang\**

State Key laboratory of Chemical Resource Engineering, Beijing University of  
Chemical Technology, 100029, Beijing, P.R. China

\* Correspondence: liuyh@mail.buct.edu.cn; lianghao@mail.buct.edu.cn

## **Additional experimental methods**

### **Adsorption and desorption of His-eGFP and eGFP**

To investigate protein adsorption, 100  $\mu$ L cell lysate of His-eGFP and eGFP were incubated with 2 mg Fe<sub>3</sub>O<sub>4</sub>/Ni-BTC in 1 mL system (with 900 $\mu$ L Milli-Q water) at room temperature for 30 min with shaking. After separated by a magnet, the supernatants were measured by fluorescence analysis. Then different concentrations of imidazole (5-50 mM) and NaCl (10-200 mM) were used as adsorption buffers. To investigate protein desorption, 100  $\mu$ L cell lysate of His-eGFP and eGFP were absorbed by 2 mg Fe<sub>3</sub>O<sub>4</sub>/Ni-BTC. Then, the composites were washed by different concentrations of Tris-HCl (10-50mM). After separated by a magnet, the supernatants were measured by fluorescence analysis.

### **Assay of Kinetics of the SAMS**

For the kinetic analysis, the reaction system is the same as for the enzyme activity determination. The concentrations of methionine or ATP were varied from 1.0 to 8.0 mM, and the other's concentration was 10 mM. The Km and Vmax were calculated by LineweaverBurk plot. The Lineweaver–Burk equation could be written as

$$\frac{1}{v} = \left( \frac{K_m}{V_{max}} \right) \frac{1}{[S]} + \frac{1}{V_{max}} \quad (1)$$

Where [S] is the concentration of substrate and V and Vmax represent the initial and maximum rates of reactions, respectively. Km is the Michaelis–Menten constant (the substrate concentration when the rate is half of Vmax).

## **Characterization**

Transmission electron microscopy (TEM) analysis was performed on a JEM 1200EX transmission electron microscope (Hitachi, Tokyo, Japan). Scanning electron microscopy (SEM) analysis was performed on a Tecnai G2 F20 scanning electron microscope (FEI, USA). The crystal structure of all samples were determined by powder X-ray diffraction (D8 Advance X-Ray diffractometer, Bruker, Karlsruhe, Germany) with a Cu K $\alpha$  anode ( $\lambda = 0.15406$  nm) at 40 kV and 40 mA. Fourier transform infrared spectroscopy was recorded on a FTIR spectrometer (8700/Continuum XL Imaging Microscope, Nicolet, Waltham, MA, USA). The spectra were collected between 400 and 4000  $\text{cm}^{-1}$ . X-ray photoelectron spectroscopy (XPS) spectra were recorded on a Thermo Scientific K-Alpha X-ray photoelectron spectrometer. Thermogravimetric analysis (TGA) was performed using a thermogravimetric analyzer (DTG-60A, Shimadzu, Japan) in the range of 30-600 °C under a nitrogen flow (heating rate of 10 °C  $\text{min}^{-1}$ ). Nitrogen adsorption-desorption isotherms were obtained using an automated surface area and pore size analyzer (Micromeritics, ASAP2020, USA) at 77 K. The pore size and pore volume were calculated by the Barrett–Joyner–Halenda (BJH) method.

**Table S1** Michaelis–Menten kinetics parameters of immobilized and free enzymes

|                    | Met            |                      |
|--------------------|----------------|----------------------|
|                    | $K_m$ (mmol/L) | $V_{max}$ (mmol/min) |
| Free enzyme        | 1.02           | 0.0053               |
| Immobilized enzyme | 1.12           | 0.004                |

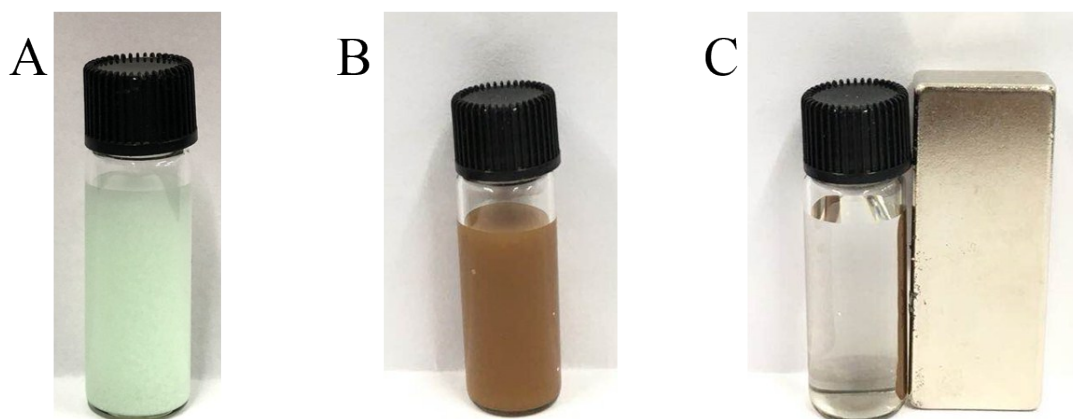

**Figure S1.** Photographs of (A) Ni-BTC, (B)  $Fe_3O_4$ /Ni-BTC, (C)  $Fe_3O_4$ /Ni-BTC separated by a magnet.

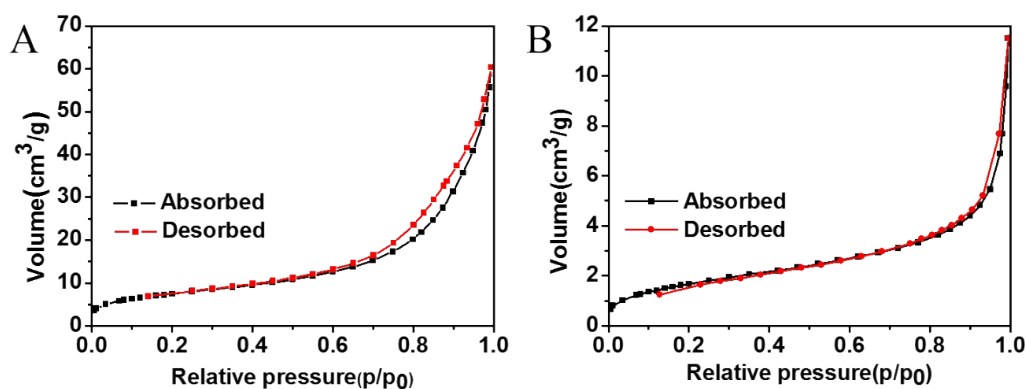

**Fig.S2** (A) N<sub>2</sub> sorption–desorption isotherms of Fe<sub>3</sub>O<sub>4</sub>/Ni-BTC, (B) N<sub>2</sub> sorption–desorption isotherms of Ni-BTC.

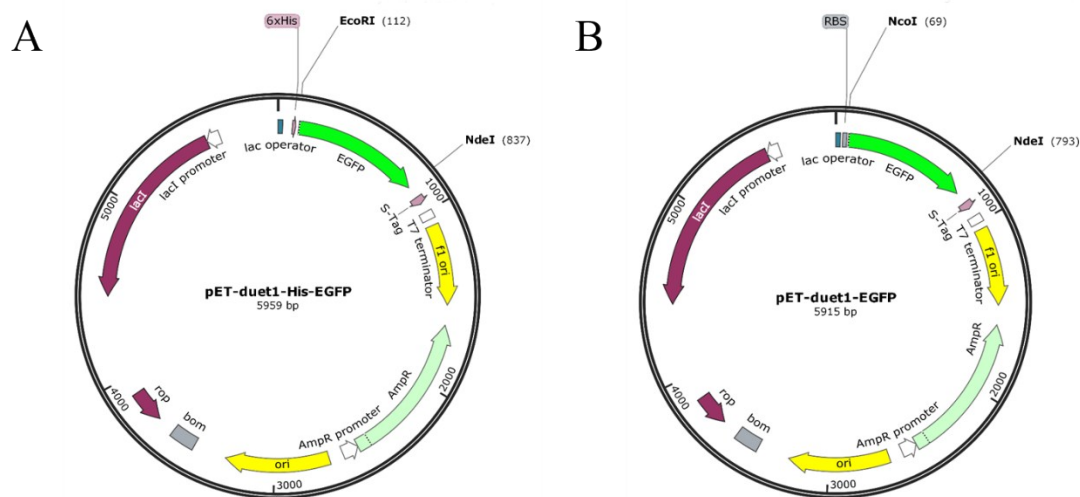

**Fig.S3** The plasmid maps of pETDuet-1-His-eGFP (A) and pETDuet-1-eGFP (B).

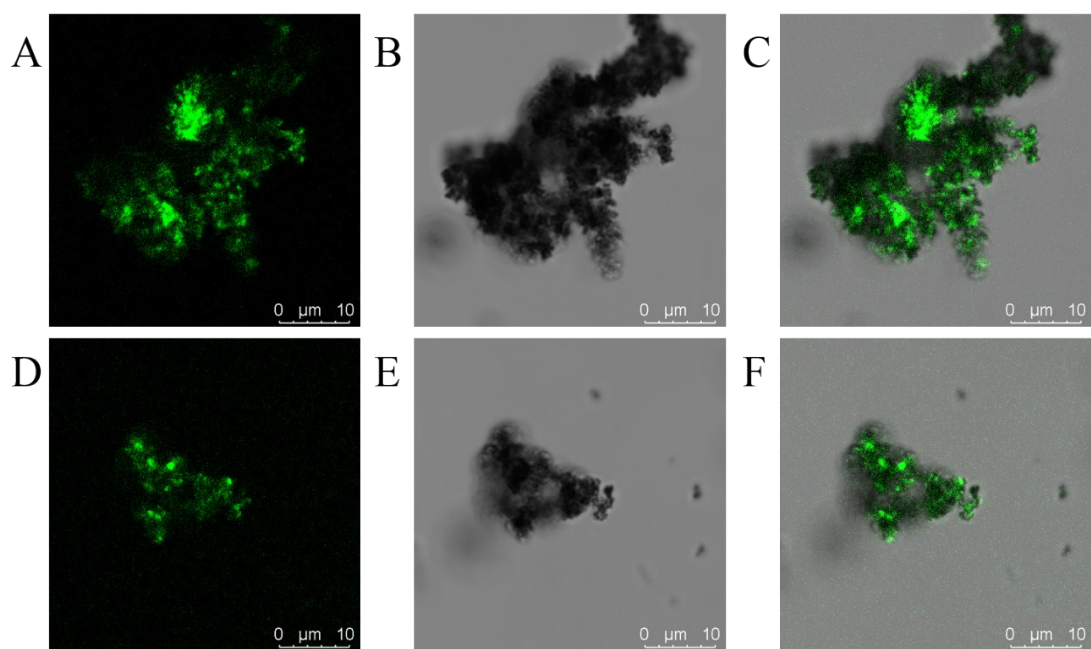

**Fig.S4** Confocal laser scanning microscopy images of His-eGFP@Fe<sub>3</sub>O<sub>4</sub>/Ni-BTC: (A) dark field image; (B) bright field image; (C) overlayer image. Confocal laser scanning microscopy images of eGFP@Fe<sub>3</sub>O<sub>4</sub>/Ni-BTC: (D) dark field image; (E) bright field image; (F) overlayer image.

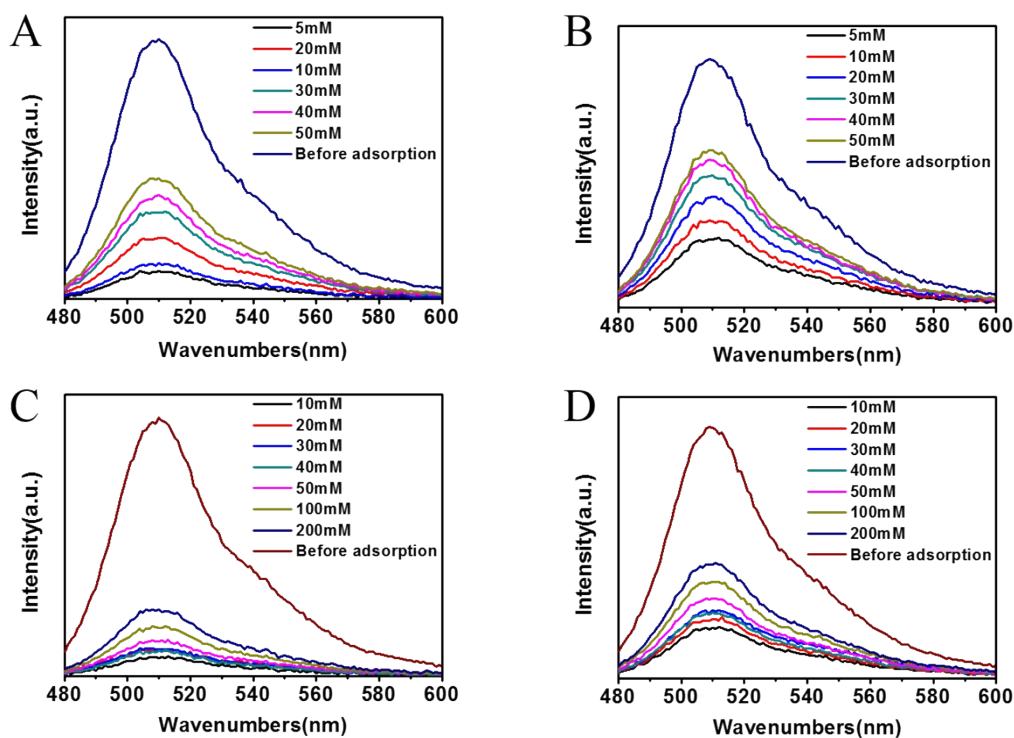

**Fig.S5** Fluorescence spectra of His-eGFP (A) and eGFP (B) solution: before and after adsorption with  $\text{Fe}_3\text{O}_4/\text{Ni-BTC}$  in different concentration of imidazole. Fluorescence spectra of His-eGFP (C) and eGFP (D) solution: before and after adsorption with  $\text{Fe}_3\text{O}_4/\text{Ni-BTC}$  in different concentration of NaCl.

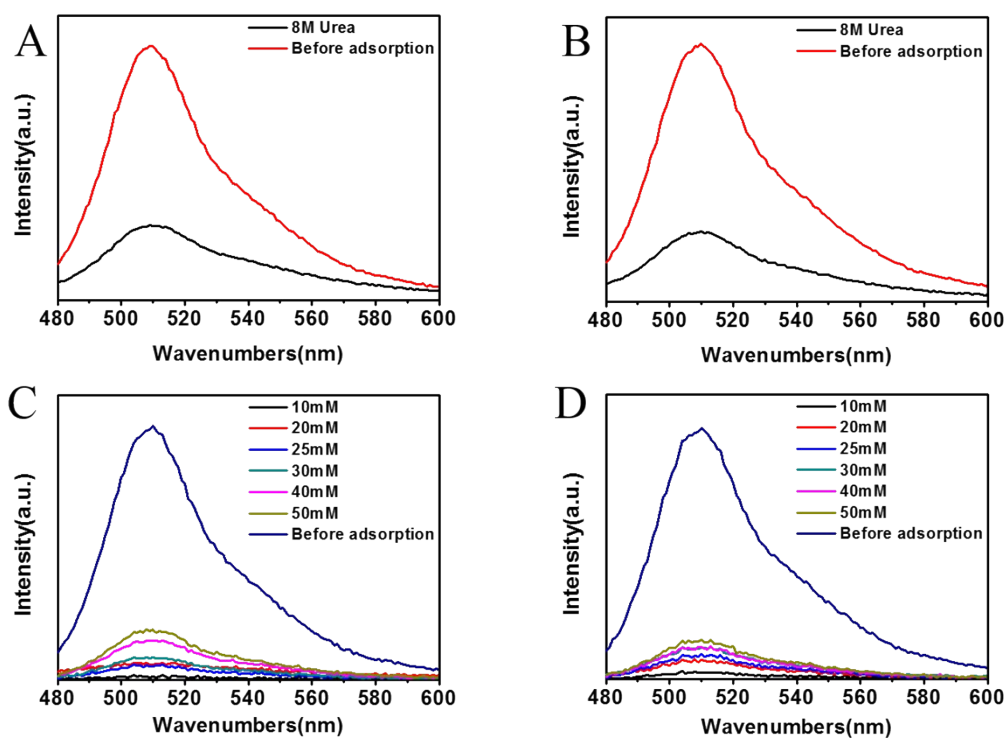

**Fig.S6** Fluorescence spectra of His-eGFP (A) and eGFP (B) solution: before reaction with  $\text{Fe}_3\text{O}_4/\text{Ni-BTC}$  and after washed by 8M urea. Fluorescence spectra of His-eGFP (C) and eGFP (D) solution: before reaction with  $\text{Fe}_3\text{O}_4/\text{Ni-BTC}$  and after washed by different concentration of Tris-HCl.

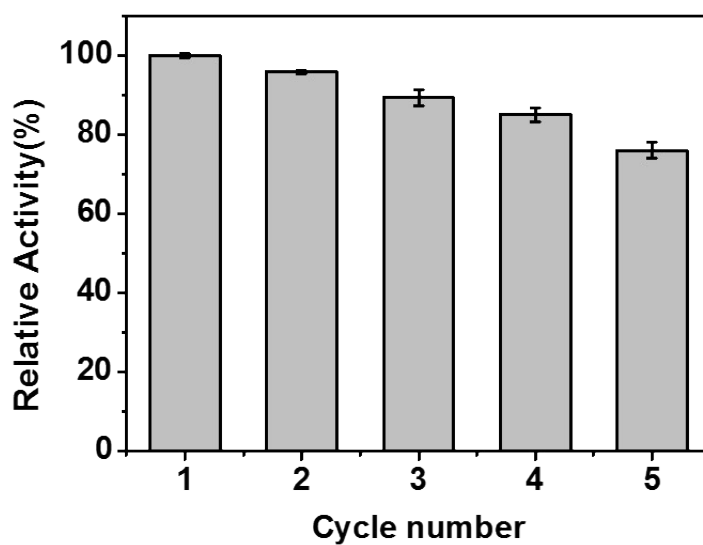

**Fig.S7** Reusability of the immobilized SAMS.
